# Supplementary material for: Potential effect of the marine carbon cycle on the multiple equilibria window of the Atlantic Meridional Overturning Circulation
Source: Copernicus journal article supplement (doi:10.5194/esd-2023-30), 2023-11-15
Supplement: Supplementary file [file esd-2023-30-AC1-supplement.pdf]

**MS-No.:** ESD-2023-30

**Title:** Potential effect of the marine carbon cycle on the multiple equilibria window of the Atlantic Meridional Overturning Circulation

**Authors:** Amber A. Boot, Anna S. von der Heydt and Henk A. Dijkstra

## Point-by-point reply to reviewer #1

June 7, 2024

We thank the reviewer for their careful reading and for the useful comments on the manuscript.

### **Summary:**

*Boot et al. study the “multiple equilibria window” (MEW) of the Atlantic Meridional Overturning Circulation (AMOC) in a coupled ocean-carbon cycle box model. Specifically, they study the interactions between the AMOC and the carbon cycle, and show, among other things, that:*

1. *AMOC off states have lower atmospheric  $p\text{CO}_2$ .*
2. *the MEW widens when more carbon is added to the system.*

*I think that this is an exciting paper. The model seems reasonable (and indeed is based on multiple previous studies) and the methodological approach is sound. The AMOC and its nonlinear behaviour are subjects of great relevance, both with respect to present or future tipping risk as well as for understanding paleoclimate dynamics, and the paper derives some interesting new insights. I always appreciate seeing dynamical systems approaches (and indeed, AUTO) used for these purposes. However, I do think that the paper’s key insights are still a little obscured behind the modelling details, and I recommend a few revisions to bring them out more clearly.*

### **Specific comments:**

1. *First, it’s challenging on an initial read to keep track of all of the cases and what they mean. This is challenging to get around without major rewrites (which I do not think are needed), but I think at minimum*

*Table 1 could be made more helpful by describing clearly what all the lambda values represent. This could be done either within the table itself, or perhaps more productively in the caption.*

**Author's reply:**

We agree that it can be difficult to keep track of all the different cases.

**Changes in manuscript:**

We will increase the clarity of the caption for Table 1 where we will more elaborately explain what the different lambda values represent.

- 2. Next, Figure 1: I think it's worth mentioning explicitly in the caption that the strength of the AMOC downwelling is set by the meridional density gradient between  $ts$  and  $n$ . Understanding exactly how AMOC strength is set in the model will help readers later on when mechanisms are explained.*

**Author's reply:**

We agree.

**Changes in manuscript:**

Suggestion followed.

- 3. Figure 3: I found this quite confusing at first read, not least because of the overlap between many of the curves. If the key point of this figure is to show the general shape of the AMOC bifurcation diagram as well as to illustrate that off states have lower  $pCO_2$ , perhaps it might be worth showing only this: i.e. AMOC vs  $Ea$  and  $pCO_2$  vs  $Ea$  for one single case (and moving the other cases to the Appendix). This is not essential, but I offer it as a suggestion.*

**Author's reply:**

We agree that the figure can be confusing.

**Changes in manuscript:**

Suggestion followed.

4. *Figure 4: my first comment is that this is really big compared to other figures that strike me as equally important, e.g. 5a. Second, it seems like what really matters are not the blue and orange lines themselves but the spaces they demarcate – why not label them accordingly? e.g. the region between the lines is precisely the MEW, the region above the blue line is one where only the off state is stable, and the region below the orange line is that where only the on-state is stable. Third, why not include CO<sub>2</sub> levels as a second x-axis at the top of the graph which maps nonlinearly onto Es? I think these changes would make the figure vastly easier to understand at first glance.*

**Author’s reply:**

Thank you for the useful suggestions.

**Changes in manuscript:**

Suggestions followed: we will label the monostable regimes and multiple equilibria window explicitly in the figure and use a second x-axis for the CO<sub>2</sub> concentrations instead of the green line and decrease the size of the figure.

5. *Figure 5: My main comment here is that this could be much larger. For example, it seems like 5a shows a major result of the paper, but it’s small and hard to read. Maybe a and b could be on the top row and c in the middle on the bottom row? Also, it’s worth mentioning in the caption the result from Caves et al. (2016) that total carbon content has varied between 24,000 and 96,000 Pg C, to make the reader understand immediately that the changes explored in the figure are reasonable.*

**Author’s reply:**

Thank you for the suggestions, and indeed Fig. 5a shows the main result of this paper.

**Changes in manuscript:**

All suggestions followed.

6. *Figure 6. I guess this is probably a Latex quirk, but it's strange to me that it's placed after the Appendix and all of the references – this makes it easy to miss at first glance. It would be good to place it much more prominently near the end of the text. Finally, I suggest replacing  $dTC/dt$  with  $d[DIC]/dt$  (if indeed that's what's meant).*

**Author's reply:**

It is indeed a Latex quirk. We have chosen not to use DIC since atmospheric  $pCO_2$  is also part of the total carbon (TC) content of the system.

**Changes in manuscript:**

We will make sure that Fig. 6 will be placed correctly in the main text. We will clarify in the caption of the figure that TC represents DIC and atmospheric  $pCO_2$ .

**More minor comments:**

1. *Line 20: It may be worth mentioning studies reporting a present-day AMOC weakening, e.g. Caesar et al. (2018), Boers (2021), Ditlevsen and Ditlevsen (2023).*

**Author's reply:**

We agree.

**Changes in manuscript:**

We will mention papers studying AMOC collapses in present-day climate as suggested by the reviewer.

2. *Lines 37-38: I'm not directly familiar with the studies by Barker et al., but at a glance it seems like these are primarily observational (i.e.*

*not model-based*). It may be worth mentioning this, as it highlights the novelty of the authors' work.

**Author's reply:**

The work of Barker et al. is indeed observation based.

**Changes in manuscript:**

We will mention this in the revision.

3. *Line 38: "of how"?*

**Author's reply:**

-

**Changes in manuscript:**

Suggestion followed.

4. *Line 54: "eddy-induced" (consistent with wind-induced)*

**Author's reply:**

-

**Changes in manuscript:**

Suggestion followed.

5. *Line 87: "to form the model used..."*

**Author's reply:**

-

**Changes in manuscript:**

Suggestion followed.

6. *Line 97: I suggest always using “riverine flux” instead of “river flux” for clarity; “river flux” is repeated a number of times throughout the paper.*

**Author’s reply:**

We agree.

**Changes in manuscript:**

Suggestion followed.

7. *Line 106/Eq. (1): It seems like there is a sum over all j missing here?*

**Author’s reply:**

You are right. Formally there should indeed be a sum over j there.

**Changes in manuscript:**

Suggestion followed.

8. *Line 128/Eq. (4): do you have some more justification for this? e.g. the 0.81 power law?*

**Author’s reply:**

This value is taken from Ridgwell et al. (2007) which represents thermodynamic calcification rates. They use this 0.81 value as a calibration parameter in the GENIE-1 Earth System Model.

**Changes in manuscript:**

We will cite the source of the function (i.e. Ridgwell et al. (2007)), and provide more background on the power law. We will also fix a typo in this equation, i.e. the expression between the brackets should be  $\left(\frac{[Ca^{2+}][CO_3^{2-}]}{K_{sp,i}} - 1\right)$

9. *Line 151: Eq. (6): The linear dependence on atmospheric CO2 here (e.g. as opposed to other powers) is a fairly strong assumption that*

*should probably be discussed.*

**Author's reply:**

The linear dependence used here comes from the original SCP-M (O'Neill et al., 2019) which is based on the works of Toggweiler (2008). In models, such as LOSCAR (Zeebe, 2012), a model of similar complexity designed to simulate the long term carbon cycle, where a power law is used. Specifically in LOSCAR the power law causes atmospheric  $p\text{CO}_2$  to converge in time to a predefined  $p\text{CO}_2$  value. Since we apply a steady state approach this method can not be used. There are also models such as COPSE (Bergman et al., 2004) and GEOCARB-SULF (Royer, 2014) that use a much more complex weathering term including effects of temperature (which is linked to atmospheric  $p\text{CO}_2$ ) and vegetation. This type of parameterization is too complex for our model.

Other powers could obviously be used in the model. Powers larger than one will decrease the sensitivity of the model to changes in the burial of  $\text{CaCO}_3$  in the ocean, and powers smaller than one will increase the sensitivity of the model. Given that the model does not seem to be very sensitive to non-linear feedbacks in the carbon cycle, we would not expect additional non-linear behavior.

**Changes in manuscript:**

We will add a few lines in the discussion where we highlight that the parameterization we use is linear and based on previous work. We will also what it would mean for the results, as described above, when a nonlinear dependence is used.

10. *Line 189: (Andersson et al. 2017)*

**Author's reply:**

-

**Changes in manuscript:**

Suggestion followed.

11. *Line 233: I think the usage of “saddle nodes” is confusing, and recommend that every instance of this be replaced with “saddle-node bifurcations”.*

**Author’s reply:**

We agree.

**Changes in manuscript:**

Suggestion followed.

12. *Figure 4: which case are these results from?*

**Author’s reply:**

They are from the uncoupled case, i.e. without active carbon cycle model in there.

**Changes in manuscript:**

We will clarify this in the caption.

13. *Line 325: and rate-induced tipping, see e.g. Alkayyon et al. (2019), Lohmann and Ditlevsen (2021)*

**Author’s reply:**

-

**Changes in manuscript:**

Suggestion followed.

14. *Line 345: space after (Eq. A2)*

**Author’s reply:**

-



**Changes in manuscript:**

Suggestion followed.

15. *Table B1 caption: “based on Cimatoribus et al. (2014)”. similar in B2-B4.*

**Author’s reply:**

-

**Changes in manuscript:**

Suggestion followed.

**References**

- Ridgwell, A., Zondervan, I., Hargreaves, J. C., Bijma, J., and Lenton, T. M.: Assessing the potential long-term increase of oceanic fossil fuel CO<sub>2</sub> uptake due to CO<sub>2</sub>-calcification feedback, *Biogeosciences*, 4, 481–492, <https://doi.org/10.5194/bg-4-481-2007>, 2007.
- O’Neill, C. M., Hogg, A. McC., Ellwood, M. J., Eggins, S. M., and Opdyke, B. N.: The [simple carbon project] model v1.0, *Geosci. Model Dev.*, 12, 1541–1572, <https://doi.org/10.5194/gmd-12-1541-2019>, 2019.
- Toggweiler, J. R.: Origin of the 100,000-yr time scale in Antarctic temperatures and atmospheric CO<sub>2</sub>, *Paleoceanography*, 23, PA2211, <https://doi.org/10.1029/2006PA001405>, 2008
- Bergman, N.M., Lenton, T.M., Watson, A.J., 2004. COPSE: A new model of biogeochemical cycling over Phanerozoic time. *American Journal of Science* 304, 397–437
- Royer, D.L., 2014. Atmospheric CO<sub>2</sub> and O<sub>2</sub> during the Phanerozoic: tools, Patterns, and Impacts 251–267
- Zeebe, R. E.: LOSCAR: Long-term Ocean-atmosphere-Sediment Carbon cycle Reservoir Model v2.0.4, *Geosci. Model Dev.*, 5, 149–166, <https://doi.org/10.5194/gmd-5-149-2012>, 2012.
